# Supplementary material for: Screening uptake of colonoscopy versus fecal immunochemical testing in first-degree relatives of patients with non-syndromic colorectal cancer: A multicenter, open-label, parallel-group, randomized trial (ParCoFit study)
Source: PubMed Central journal article supplement (PMC10597530; doi:10.1371/journal.pmed.1004298), 2023-10-24
Supplement: pmed.1004298.s003.pdf [file pmed.1004298.s003.pdf]

- 5 MAR 2015

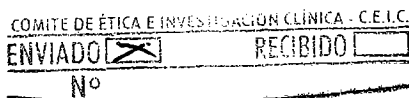

El estudio de investigación titulado: **“Comparación del test de sangre oculta en heces y la colonoscopia en el cribado del cáncer colorrectal familiar: análisis de la adherencia, eficacia diagnóstica y coste-efectividad”**, con código 2014\_45, del que es Investigador Principal el Dr. **ANTONIO Z. GIMENO GARCIA**, ha sido evaluado por el Comité Ético de Investigación Clínica del Hospital Universitario de Canarias en su sesión del **31 de julio de 2014**, y considera que:

Se cumplen los requisitos necesarios de idoneidad del Protocolo con los objetivos del estudio.

El procedimiento para obtener el consentimiento informado, incluyendo la hoja de información para los sujetos y el consentimiento informado, es adecuado.

La capacidad del Investigador y los medios disponibles son adecuados para llevar a cabo el estudio y no interfiere con el respeto a los postulados éticos.

Por todo ello, el Comité Ético de Investigación Clínica del Hospital Universitario de Canarias **Autoriza\*** la realización de este estudio.

La Laguna, a 31 de julio de 2014.

Firmado:

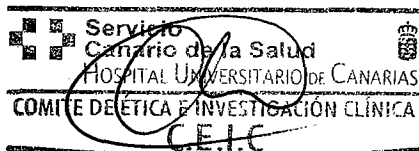

Dra. **CONSUELO MARIA RODRIGUEZ JIMENEZ**  
Secretaría del Comité Ético de Investigación Clínica  
Hospital Universitario de Canarias

**\*NOTA ACLARATORIA AL PROMOTOR:**

- La realización de este ensayo clínico en nuestro centro estará condicionada a la aportación de la póliza de seguro de responsabilidad civil a este Comité.

La Laguna, a 31 de julio de 2014.

Firmado:

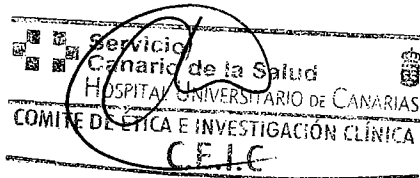

**Dra. CONSUELO MARIA RODRIGUEZ JIMENEZ**  
Secretaría del Comité Ético de Investigación Clínica  
Hospital Universitario de Canarias
